# Supplementary material for: Toxic Indole Diterpenes from Endophyte-Infected Perennial Ryegrass Lolium perenne L.: Isolation and Stability
Source: PubMed Central journal article supplement (PMC6356652; doi:10.3390/toxins11010016), 2019-01-03
Supplement: toxins-11-00016-s001.pdf [file toxins-11-00016-s001.pdf]

## Supplementary Materials: Toxic Indole Diterpenes from Endophyte-Infected Perennial Ryegrass *Lolium perenne* L.: Isolation and Stability

Priyanka Reddy, Myrna A. Deseo, Vilnis Ezernieks, Kathryn Guthridge, German Spangenberg and Simone Rochfort

Table S1. <sup>1</sup>H and <sup>13</sup>C NMR chemical shifts of lolitrem B (1), lolitrem E (2) and lolitriol (5), (700 MHz, CDCl<sub>3</sub>).

| Position | Lolitrem B (1)                   |                 | Lolitrem E (2)                   |                 | Lolitriol (5)                    |                 |
|----------|----------------------------------|-----------------|----------------------------------|-----------------|----------------------------------|-----------------|
|          | <sup>1</sup> H (J in Hz)         | <sup>13</sup> C | <sup>1</sup> H (J in Hz)         | <sup>13</sup> C | <sup>1</sup> H (J in Hz)         | <sup>13</sup> C |
| 2        |                                  | 152.8           |                                  | 152.7           |                                  | 152.8           |
| 3        |                                  | 50.7            |                                  | 50.7            |                                  | 50.7            |
| 4        |                                  | 42.5            |                                  | 42.4            |                                  | 42.4            |
| 5a       | 2.70 <i>td</i> (5.3, 14.0)       | 27.6            | 2.72 <i>td</i> (5.6, 14.0)       | 27.4            | 1.32 <i>m</i>                    | 27.6            |
| 5b       | 1.35 <i>m</i>                    |                 | 1.29 <i>m</i>                    |                 | 2.71 <i>m</i>                    |                 |
| 6a       | 2.28 <i>m</i>                    | 28.1            | 2.27 <i>m</i>                    | 27.7            | 2.29 <i>m</i>                    | 27.9            |
| 6b       | 1.77 <i>tdd</i> (5.3, 9.0, 14.0) |                 | 1.75 <i>tdd</i> (5.6, 9.1, 14.0) |                 | 1.75 <i>tdd</i> (5.6, 9.0, 14.0) |                 |
| 7        | 4.32 <i>t</i> (9.0)              | 71.6            | 4.18 <i>t</i> (9.0)              | 71.3            | 4.19 <i>t</i> (9.0)              | 71.5            |
| 9        | 3.56 <i>d</i> (9.0)              | 71.4            | 3.41 <i>d</i> (9.0)              | 74.7            | 3.32 <i>d</i> (9.0)              | 76.9            |
| 10       | 3.90 <i>d</i> (9.0)              | 71.2            | 3.97 <i>dd</i> (9.0)             | 67.1            | 3.99 <i>d</i> (9.0)              | 67.5            |
| 11       | 3.61 <i>s</i>                    | 61.3            | 3.59 <i>s</i>                    | 64.3            | 3.60 <i>s</i>                    | 64.7            |
| 12       |                                  | 67.8            |                                  | 68.5            |                                  | 70.0            |
| 13       |                                  | 78.2            |                                  | 77.8            |                                  | 78.0            |
| 14a      | 1.56 <i>dt</i> (3.0, 13.5)       | 30.4            | 1.59 <i>dt</i> (3.0, 13.5)       | 30.1            | 1.58 <i>d</i> (13.5)             | 30.5            |
| 14b      | 1.44 <i>dd</i> (3.0, 13.5)       |                 | 1.48 <i>m</i>                    |                 | 1.47 <i>dt</i> (3.0, 13.5)       |                 |
| 15a      | 1.93 <i>ddd</i> (3.0, 12.5, 25)  | 20.6            | 1.93 <i>ddd</i> (3.0, 12.5, 25)  | 20.4            | 1.93 <i>m</i>                    | 20.5            |
| 15b      | 1.64 <i>m</i>                    |                 | 1.63 <i>m</i>                    |                 | 1.64 <i>d</i> (13.5)             |                 |
| 16       | 2.84 <i>m</i>                    | 50.2            | 2.85 <i>m</i>                    | 50.0            | 2.85 <i>m</i>                    | 50.3            |
| 17a      | 2.62 <i>dd</i> (11.0, 13.0)      | 29.3            | 2.62 <i>dd</i> (11.0, 13.0)      | 29.1            | 2.62 <i>m</i>                    | 29.3            |
| 17b      | 2.92 <i>dd</i> (6.0, 13.0)       |                 | 2.92 <i>dd</i> (6.0, 13.0)       |                 | 2.92 <i>d</i> (13.0)             |                 |
| 18       |                                  | 118.8           |                                  | 118.6           |                                  | 118.8           |
| 19       |                                  | 126.1           |                                  | 123.9           |                                  | 126.3           |
| 20       |                                  | 124.0           |                                  | 126.0           |                                  | 124.2           |
| 21       |                                  | 137.1           |                                  | 137.2           |                                  | 137.2           |
| 22       | 7.86 <i>d</i> (8.6)              | 120.5           | 7.85 <i>d</i> (8.6)              | 120.2           | 7.85 <i>d</i> (8.6)              | 120.5           |
| 23       | 7.21 <i>d</i> (8.6)              | 110.5           | 7.20 <i>d</i> (8.6)              | 110.3           | 7.20 <i>d</i> (8.6)              | 110.5           |
| 24       |                                  | 142.0           |                                  | 141.8           |                                  | 142.2           |
| 25       | 1.27 <i>s</i>                    | 16.1            | 1.27 <i>s</i>                    | 15.9            | 1.27 <i>s</i>                    | 16.2            |
| 26       | 1.14 <i>s</i>                    | 19.1            | 1.12 <i>s</i>                    | 18.7            | 1.11 <i>s</i>                    | 19.0            |
| 27       |                                  | 74.9            |                                  | 78.5            |                                  | 73.8            |
| 28       | 1.289 <i>s</i>                   | 28.4            | 1.27 <i>s</i>                    | 24.2            | 1.23 <i>s</i>                    | 24.2            |
| 29       | 1.280 <i>s</i>                   | 16.7            | 1.21 <i>s</i>                    | 28.5            | 1.28 <i>s</i>                    | 28.5            |
| 30       |                                  | 196.6           |                                  | 196.9           |                                  | 196.7           |

|     |                            |       |                            |       |                            |      |
|-----|----------------------------|-------|----------------------------|-------|----------------------------|------|
| 31  | 2.76 <i>d</i> (14.3)       | 60.1  | 2.76 <i>d</i> (14.0)       | 59.9  | 2.76                       | 60.1 |
| 32  |                            | 80.0  |                            | 79.8  |                            | 80.2 |
| 34  |                            | 79.3  |                            | 79.0  |                            | 79.5 |
| 35  | 2.65 <i>m</i>              | 50.0  | 2.66 <i>m</i>              | 49.7  | 2.65 <i>m</i>              | 50.0 |
| 36a | 2.95 <i>dd</i> (12, 15.3)  | 28.4  | 2.96 <i>dd</i> (12, 15.3)  | 28.3  | 2.95 <i>dd</i> (12, 15.3)  | 28.6 |
| 36b | 3.42 <i>dd</i> (4.1, 15.3) |       | 3.42 <i>dd</i> (4.1, 15.3) |       | 3.42 <i>dd</i> (4.1, 15.3) |      |
| 37  | 1.52 <i>s</i>              | 30.8  | 1.52 <i>s</i>              | 30.6  | 1.52 <i>s</i>              | 30.9 |
| 38  | 1.31 <i>s</i>              | 25.2  | 1.30 <i>s</i>              | 25.0  | 1.31 <i>s</i>              | 25.3 |
| 39  | 1.24 <i>s</i>              | 25.2  | 1.24 <i>s</i>              | 25.3  | 1.23 <i>s</i>              | 25.3 |
| 40  | 1.38 <i>s</i>              | 29.5  | 1.37 <i>s</i>              | 29.6  | 1.37 <i>s</i>              | 29.6 |
| 43  | 5.52 <i>d</i> (6.6)        | 92.8  | 3.94 <i>d</i> (6.7)        | 57.7  |                            |      |
| 44  | 5.29 <i>d</i> (6.6)        | 122.1 | 5.24 <i>t</i> (6.7)        | 120.6 |                            |      |
| 45  |                            | 139.7 |                            | 137.2 |                            |      |
| 46  | 1.71 <i>s</i>              | 18.8  | 1.69 <i>s</i>              | 17.7  |                            |      |
| 47  | 1.73 <i>s</i>              | 25.8  | 1.64 <i>s</i>              | 25.6  |                            |      |
| NH  | 7.97 <i>br s</i>           |       | 7.95 <i>br s</i>           |       | 8.02 <i>br s</i>           |      |

br = broad, t = triplet, d = doublet, td = triplet of doublets, tdd = triplet of doublet of doublets, dd = doublet of doublets, dt = doublet of triplets, m = multiplet, s = singlet, ddd = doublet of doublet of doublets

**Table S2.** <sup>1</sup>H and <sup>13</sup>C NMR chemical shifts of paspaline (3) and terpendole B (4) (700 MHz, CDCl<sub>3</sub>).

| Position | Paspaline (3)              |                 | Terpendole B (4)                  |                 |
|----------|----------------------------|-----------------|-----------------------------------|-----------------|
|          | <sup>1</sup> H (J in Hz)   | <sup>13</sup> C | <sup>1</sup> H (J in Hz)          | <sup>13</sup> C |
| 2        |                            | 150.7           |                                   | 150.2           |
| 3        |                            | 52.8            |                                   | 50.6            |
| 4        |                            | 39.8            |                                   | 39.9            |
| 5a       | 1.95 <i>td</i> (4.0, 13.0) | 34.0            | 1.94 <i>td</i> (4.3, 13.6)        | 32.8            |
| 5b       | 1.60 <i>m</i>              |                 | 1.58 <i>m</i>                     |                 |
| 6a       | 1.60 <i>m</i>              | 25.1            | 1.83 <i>tdd</i> (4.3, 10.2, 13.6) | 29.6            |
| 6b       | 1.77 <i>m</i>              |                 | 2.25 <i>m</i>                     |                 |
| 7        | 3.00 <i>dd</i> (3.7, 12.0) | 85.5            | 3.94 <i>t</i> (8.1)               | 73.8            |
| 9        | 3.20 <i>dd</i> (2.7, 12.1) | 84.5            | 3.57 <i>dd</i> (2.2, 11.1)        | 74.9            |
| 10a      | 1.62 <i>m</i>              | 21.8            | 1.78 <i>dd</i> (11.1, 14.0)       | 26.5            |
| 10b      | 1.43 <i>m</i>              |                 | 2.04 <i>br d</i> (14.0)           |                 |
| 11a      | 1.12 <i>m</i>              | 37.5            | 3.42 <i>d</i> (2.0)               | 56.0            |
| 11b      | 1.82 <i>m</i>              |                 |                                   |                 |
| 12       | -                          | 36.5            | -                                 | 61.8            |
| 13       | 1.46 <i>m</i>              | 46.3            | 2.10 <i>dd</i> (3.2, 13.0)        | 41.1            |
| 14a      | 1.37 <i>m</i>              | 21.8            | 1.66 <i>m</i>                     | 22.3            |
| 14b      | 1.67 <i>m</i>              |                 | 1.05 <i>m</i>                     |                 |
| 15a      | 1.59 <i>m</i>              | 25.1            | 1.57 <i>m</i>                     | 24.4            |
| 15b      | 1.76 <i>m</i>              |                 | 1.71 <i>m</i>                     |                 |
| 16       | 2.75 <i>m</i>              | 48.6            | 2.76 <i>m</i>                     | 49.9            |
| 17a      | 2.31 <i>m</i>              | 27.3            | 2.68 <i>dd</i> (6.3, 13.3)        | 27.5            |
| 17b      | 2.65 <i>dd</i> (6.5, 13.3) |                 | 2.34 <i>dd</i> (10.5, 13.3)       |                 |
| 18       |                            | 118.2           |                                   | 118.6           |
| 19       |                            | 125.0           |                                   | 125.4           |
| 20       | 7.40 <i>m</i>              | 118.1           | 7.41 <i>d</i> (7.5)               | 118.7           |
| 21       | 7.05 <i>m</i>              | 119.3           | 7.06 <i>dq</i> (1.4, 6, 1.9)      | 120.0           |

|        |                  |       |                              |       |
|--------|------------------|-------|------------------------------|-------|
| 22     | 7.06 <i>m</i>    | 120.2 | 7.07 <i>dq</i> (1.4, 6, 1.9) | 121.0 |
| 23     | 7.27 <i>m</i>    | 111.2 | 7.29 <i>d</i> (7.5)          | 111.7 |
| 24     |                  | 139.9 |                              | 140.2 |
| 25     | 1.01 <i>s</i>    | 14.4  | 1.01 <i>s</i>                | 14.8  |
| 26     | 1.12 <i>s</i>    | 19.8  | 1.05 <i>s</i>                | 16.7  |
| 27     |                  | 71.8  |                              | 71.5  |
| 28     | 1.16 <i>s</i>    | 23.7  | 1.10 <i>s</i>                | 24.1  |
| 29     | 1.17 <i>s</i>    | 26.0  | 1.16 <i>s</i>                | 26.7  |
| 30     | 0.86 <i>s</i>    | 12.6  |                              |       |
| NH (s) | 7.67 <i>br s</i> |       | 7.72 <i>br s</i>             |       |

br = broad, t = triplet, td = triplet of doublets, dd = doublet of doublets, dq = doublet of quartets, m = multiplet, s = singlet.

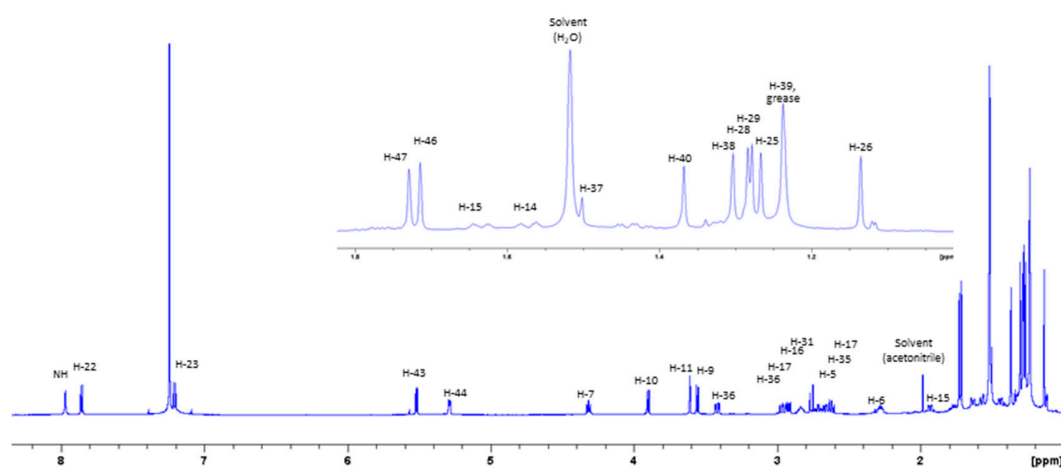

Figure S1. <sup>1</sup>H NMR spectrum of a pure fraction of lolitrem B (700 MHz, CDCl<sub>3</sub>).

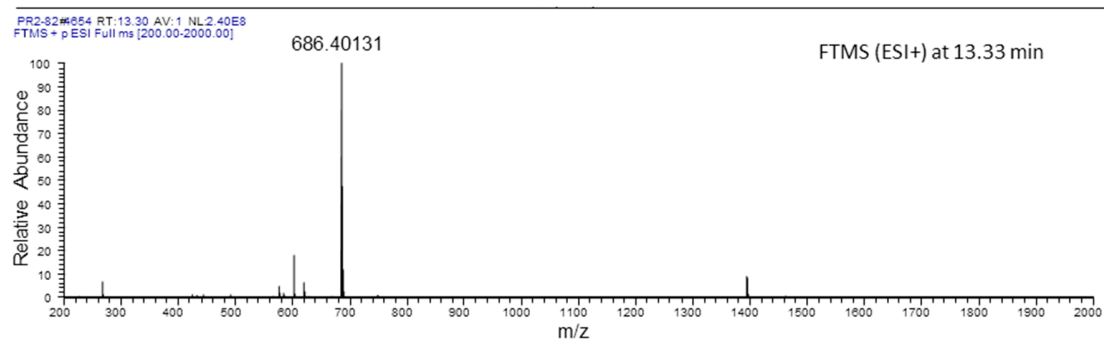

Figure S2. Mass spectrum of lolitrem B in positive ion mode (ESI+) LC-ESI-FTMS with an observed ion at  $m/z$  686.4013 [ $M+H$ ]<sup>+</sup> ( $\Delta$  5.5 ppm).

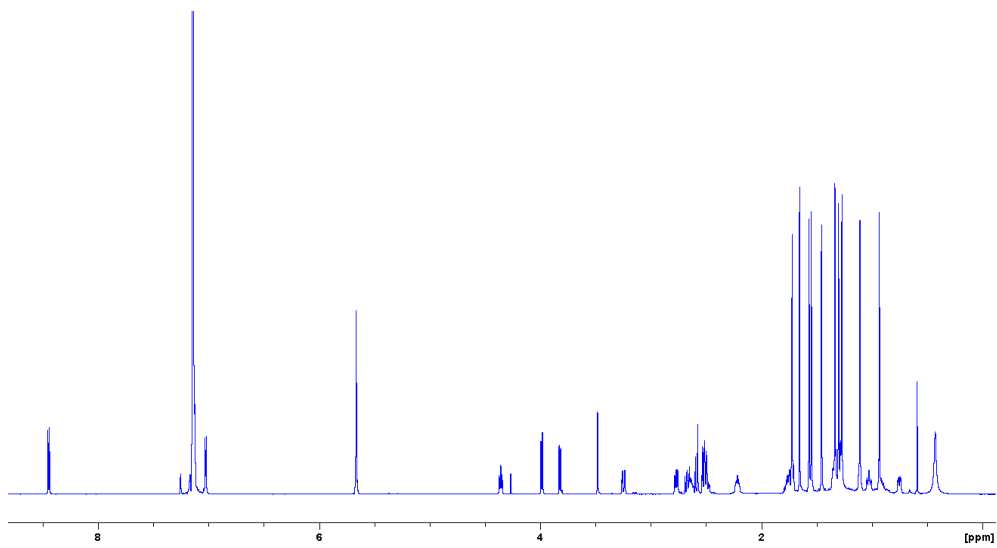

**Figure S3.**  $^1\text{H}$  NMR spectrum of a pure fraction of lolitrem B (700 MHz, Benzene- $d_6$ ).

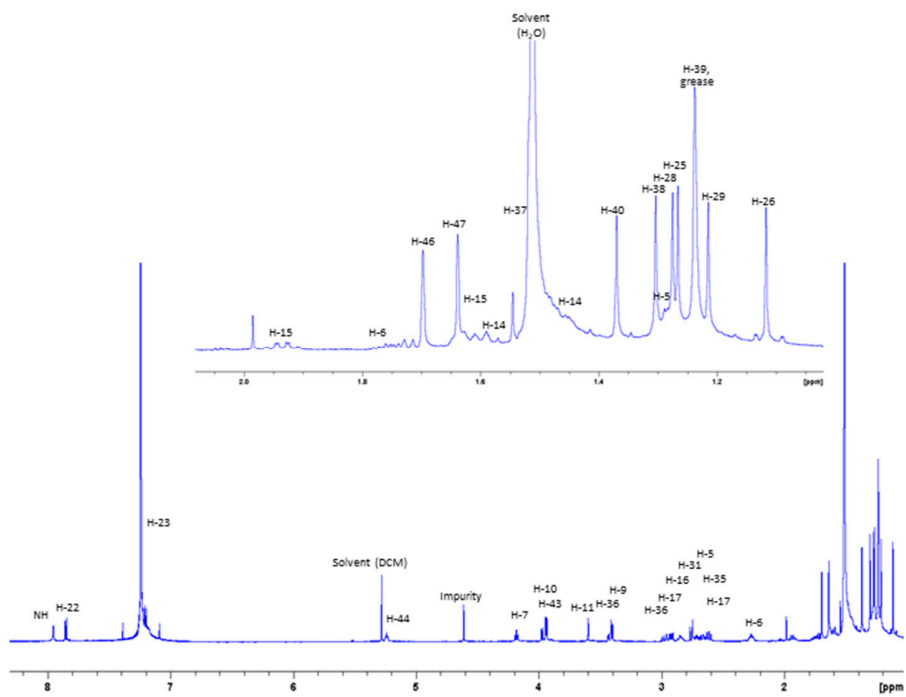

**Figure S4.**  $^1\text{H}$  NMR spectrum of a pure fraction of lolitrem E (700 MHz,  $\text{CDCl}_3$ ).

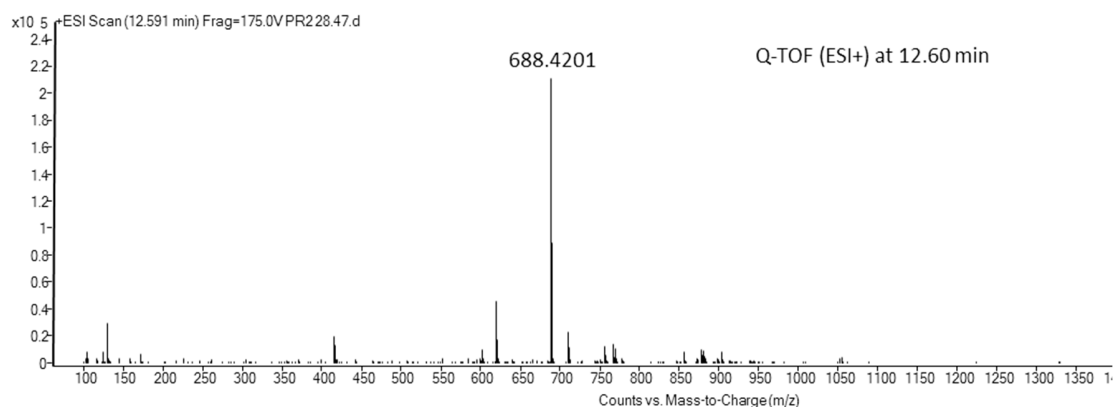

**Figure S5.** Mass spectrum of lolitrem E in positive ion mode (ESI+) LC-ESI-Q-TOF with an observed ion at  $m/z$  688.4201  $[M+H]^+$  ( $\Delta$  1.74 ppm).

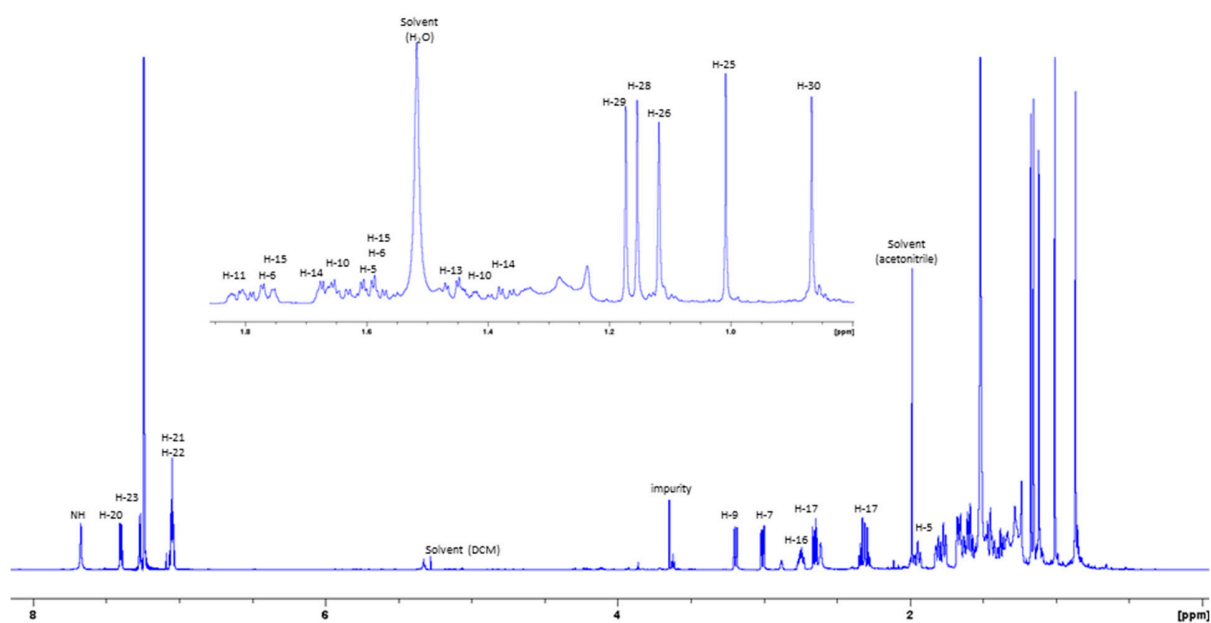

**Figure S6.**  $^1\text{H}$  NMR spectrum of a pure fraction of paspaline (700 MHz,  $\text{CDCl}_3$ ).

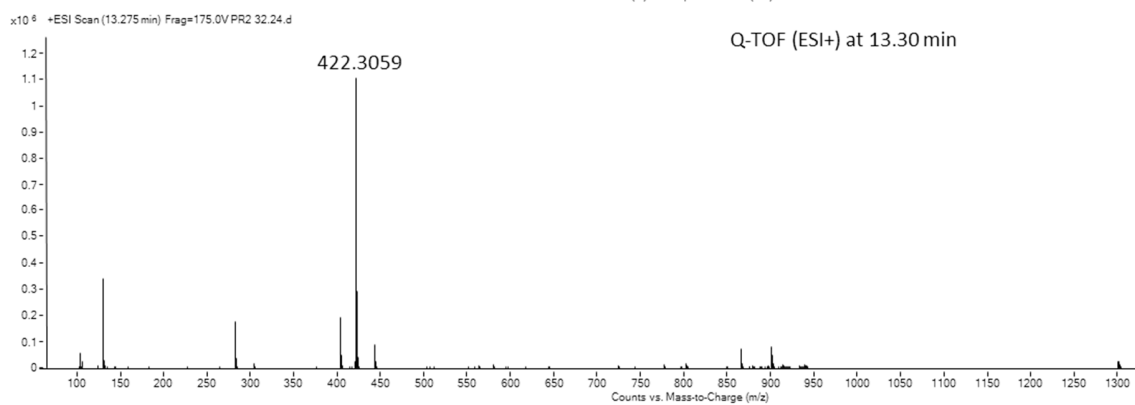

**Figure S7.** Mass spectrum of the paspaline in positive ion mode (ESI+) LC-ESI-Q-TOF with an observed ion at  $m/z$  422.3059  $[M+H]^+$  ( $\Delta$  0.0 ppm).

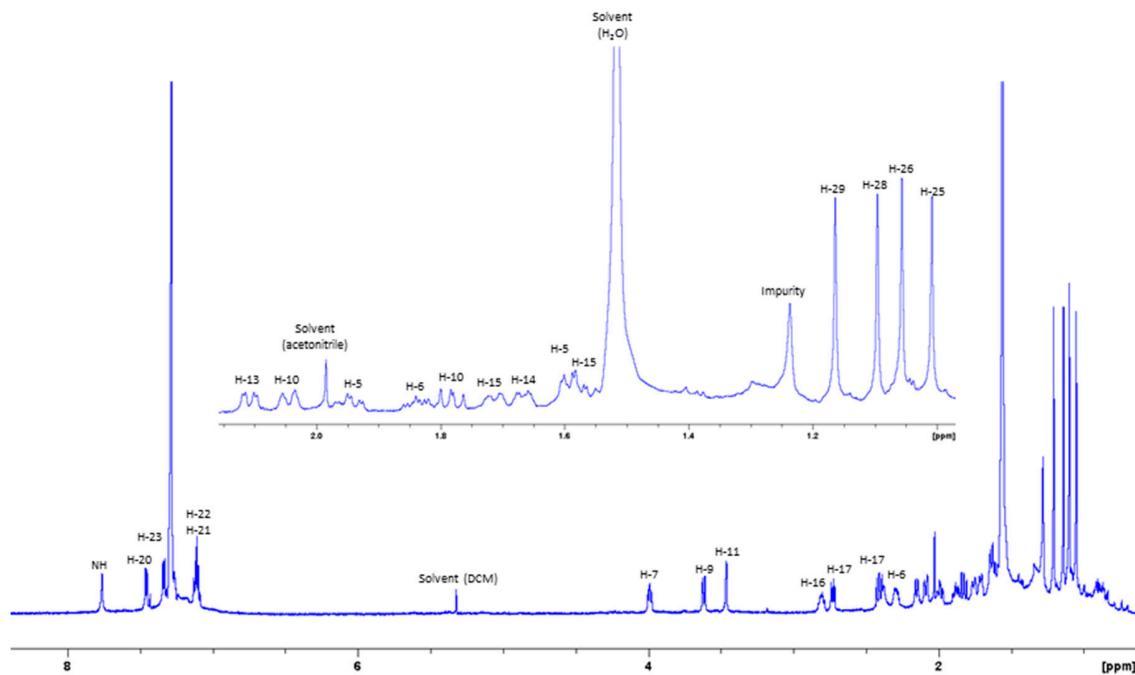

Figure S8. <sup>1</sup>H NMR spectrum of a pure fraction of terpendole B (700 MHz, CDCl<sub>3</sub>).

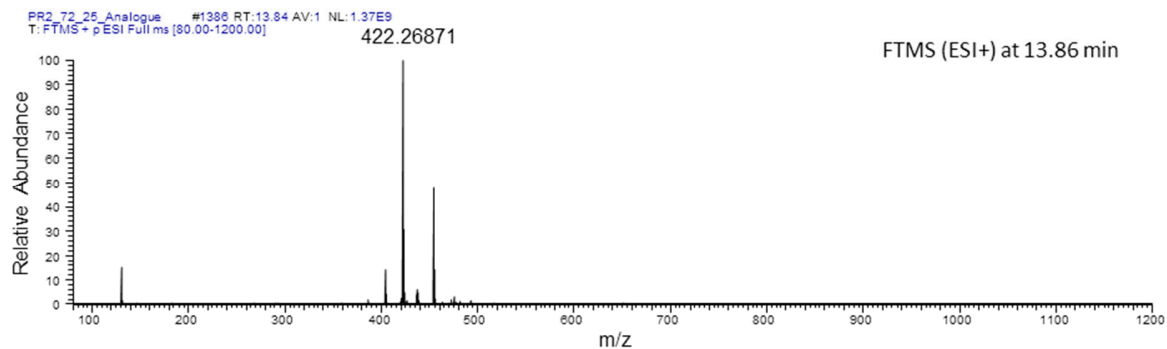

Figure S9. Mass spectrum of the terpendole B in positive ion mode (ESI+) LC-ESI-FTMS with an observed ion at  $m/z$  422.2681  $[M+H]^+$  ( $\Delta$  1.9 ppm).

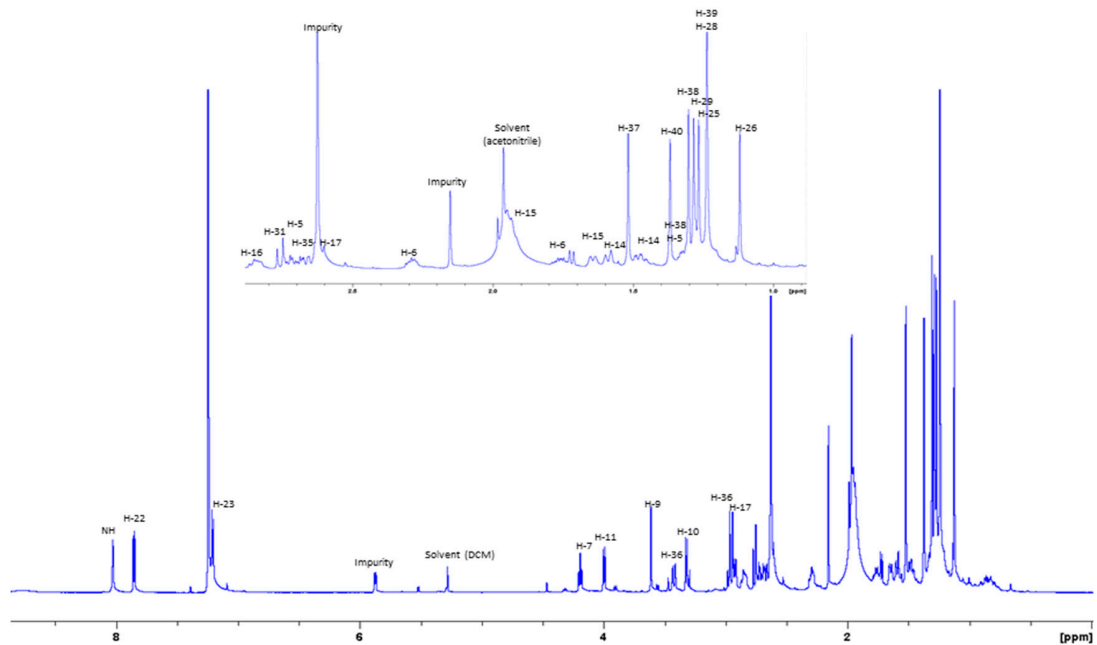

Figure S10. <sup>1</sup>H NMR spectrum of lolitriol (700 MHz, CDCl<sub>3</sub>).

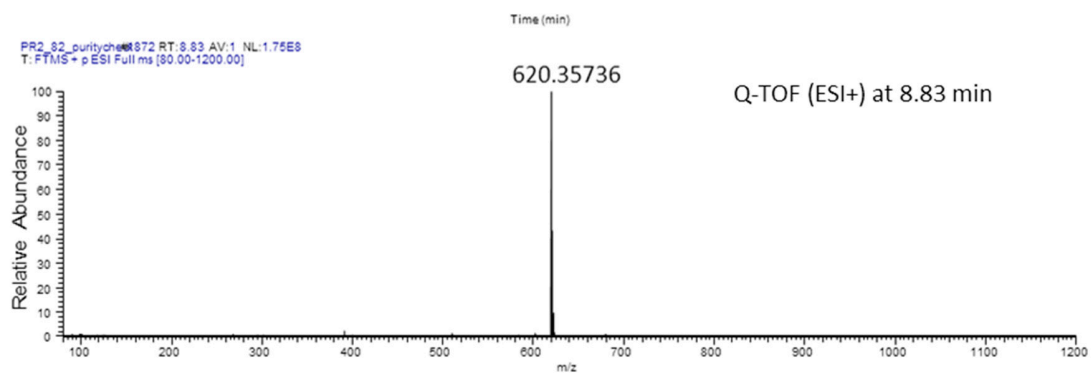

Figure S11. Mass spectrum of lolitriol in positive ion mode (ESI+) LC-ESI-FTMS with an observed ion at  $m/z$  620.3573 [M+H]<sup>+</sup> ( $\Delta$  1.4 ppm).
